1

2 ***Time-course single-cell RNA sequencing reveals***  
3 ***transcriptional dynamics and heterogeneity of limbal***  
4 ***stem cells derived from human pluripotent stem cells***

5

6 Changbin Sun<sup>1,2,3\*</sup>, Hailun Wang<sup>4\*</sup>, Qiwan Ma<sup>1,3</sup>, Chao Chen<sup>1,3</sup>, Jianhui Yue<sup>1,3,5</sup>, Bo

7 Li<sup>1,3,#</sup>, Xi Zhang<sup>1,3,#</sup>

8

9

10 <sup>1</sup> BGI-Shenzhen, Shenzhen, 518083, China

11 <sup>2</sup> BGI Education Center, University of Chinese Academy of Sciences, Shenzhen

12 518083, China

13 <sup>3</sup> China National GeneBank, BGI-Shenzhen, Shenzhen 518082, China

14 <sup>4</sup> Department of Radiation Oncology, School of Medicine, Johns Hopkins University,

15 Baltimore, MD 21218, United States

16 <sup>5</sup> Section of Cell Biology and Physiology, Department of Biology, University of

17 Copenhagen, Copenhagen, Denmark

18 \* Contributed equally to this work

19 # Corresponding authors

20 E-mail address: zhangxi1@genomics.cn (XZ)

21

22

23

24

25

26

27

28

29

## 30 **Abstract**

31 Human pluripotent stem cell-derived limbal stem cells (hPSC-derived LSCs) provide  
32 a promising cell source for corneal transplants and ocular surface reconstruction.

33 Although recent efforts in the identification of LSC markers have increased our  
34 understanding of the biology of LSCs, the lack of knowledge of the developmental

35 origin, cell fate determination, and identity of human LSCs hindered the

36 establishment of differentiation protocols for hPSC-derived LSCs and hold back their

37 clinical application. Here, we performed a time-course single-cell RNA-seq to

38 investigate transcriptional heterogeneity and expression changes of LSCs derived

39 from human embryonic stem cells. Based on current protocol, expression

40 heterogeneity of reported LSC markers were identified in subpopulations of

41 differentiated cells. EMT has been shown to occur during differentiation process,

42 which could possibly result in generation of untargeted cells. Pseudotime trajectory

43 analysis revealed transcriptional changes and signatures of commitment of

44 hPSCs-derived LSCs and their progeny - the transit amplifying cells. Furthermore,

45 several new makers of LSCs were identified, which could facilitate elucidating the

46 identity and developmental origin of human LSCs *in vivo*.

47 **Keywords:** LSCs; scRNA-seq; identity; developmental trajectory

48

49

50

51

## 52 **Introduction**

53 Human limbal stem cells (LSCs) are located in a narrow area around the cornea and  
54 connect directly to the sclera (Busin et al., 2016; Davanger and Evensen, 1971;  
55 Kawakita et al., 2011). Other than self-renewal capability for homeostasis  
56 maintenance, LSCs have unipotency to differentiated into cornea epithelial cells and  
57 play vital role in corneal regeneration and repair to sustain the corneal integrity and  
58 homeostasis (Ebrahimi et al., 2009). However, internal or external factors, such as  
59 genetic, chemical, burn, infection etc., could result in limbal malfunction and limbal  
60 stem cells deficiency (LSCD), and lead to reduced vision and blindness (Barut Selver  
61 et al., 2017; Kim and Mian, 2017; Le et al., 2018).

62 Among different treatment options, LSC transplantation is currently the best  
63 curative treatment that can improve both vision and quality-of-life in patients with  
64 ocular surface disorders caused by LSCD (Atallah et al., 2016). Although the  
65 developmental origin of LSC remains enigmatic, most studies considered that the  
66 corneal epithelium descend from surface ectoderm (SE) (Gonzalez et al., 2018;  
67 Hongisto et al., 2017), and give rise to structures of the epidermis and ectodermal  
68 associated appendages such as hair, eye, ear, and the mammary gland etc. (Tchieu et  
69 al., 2017). However, developmental surface ectodermal cells and their derivatives are  
70 difficult to isolate and study in human. Our understanding on cell-fate specification of

71 the limbal stem cells *in vivo* are limited and largely from studies of classic model  
72 organisms, such as mouse (Kaplan et al., 2019; Wolosin et al., 2004) and *Xenopus*  
73 frogs (Sonam et al., 2019). But it is well-known that final maturation pathways are  
74 significantly different between humans and other model animals, though their  
75 pre-implantation development appears relatively similar (Rossant, 2015). Thus, the  
76 directed differentiation of human pluripotent stem cells (hPSCs) to LSCs could offer  
77 an alternative model system to explore these cells' identity and fate decisions for basic  
78 and clinical applications (Ahmad et al., 2007; Chakrabarty et al., 2018; Hanson et al.,  
79 2013; Hayashi et al., 2016; Kamarudin et al., 2018; Tchieu et al., 2017). However,  
80 available differentiation protocols are still inefficient and suffer from excessive  
81 heterogeneity (Pattison et al., 2018). The lack of specific markers for LSCs, and our  
82 limited knowledge about intrinsic signaling cascades and developmental mechanisms  
83 of human LSCs hindered the clinical application of LSCs (Chakrabarty et al., 2018;  
84 Gonzalez et al., 2018).

85 Single-cell RNA sequencing (scRNA-seq) is a powerful tool to quantify  
86 transcripts in individual cells to understand gene expression changes at single-cell  
87 resolution (Gurtner et al., 2018). Since the first publication in 2009 (Tang et al., 2009),  
88 scRNA-seq have increasingly been utilized in many fields, such as developmental  
89 biology to delineate cell lineage relationships and developmental trajectories (Clark et  
90 al., 2019; Hu et al., 2019; Su et al., 2017). In this study, we performed a time-course  
91 single-cell transcriptomic analysis of LSCs derived from human embryonic stem cells  
92 *in vitro* to understand transcriptional regulation during human LSCs development.

93

## 94 **Experimental Procedures**

### 95 **Cell culture**

96 The Ethics Committee of BGI-IRB approved this study. Human ESC lines H9 were  
97 cultured as previous description (Sun et al., 2018). Briefly, cells were retrieved from  
98 liquid nitrogen tank and cultured in hESC medium (DMEM/F12 basic medium (Life  
99 Technologies), 20% knockout serum replacement (KSR, Life Technologies),  
100 1×L-glutamine (Life Technologies), 1×MEM NEAA (Life Technologies), 0.1mM  
101 2-Mercaptoethanol (Life Technologies) and 50 ng/mL human FGF-2 (Life  
102 Technologies)) on mitomycin C (Sigma) treated murine embryonic fibroblasts  
103 (MEFs). To sustain undifferentiated states, cells were fed daily with fresh medium.  
104 For passaging, colonies were dispersed into small clumps with 1mg/mL Collagenase  
105 IV (Life Technologies) for 20 min at 37°C, then plated onto Matrigel hESC-qualified  
106 Matrix (Corning)-coated dishes in mTeSR1 medium (Stemcell Technologies) at a  
107 ratio of 1:3 to 1:6. In the feeder-free medium, ReLeSR™ (Stemcell Technologies)  
108 were used for dissociation and passaging according to the manual.

### 109 **LSCs induction**

110 LSCs were differentiated from human ESCs according to the published protocols with  
111 some changes (Hongisto et al., 2017; Mikhailova et al., 2014). Briefly, when colonies  
112 reaching about 80-90% confluency, ReLeSR™ were used to digest cells into clumps.  
113 Then, these clumps were suspended in LSCs induction medium (DMEM/F12 basic

114 medium, supplemented with 20% KSR, 1×L-glutamine, 1×MEM NEAA, 0.1mM  
115 2-Mercaptoethanol) adding 10μM Y-27632 (Sigma) at 37°C to induce embryoid body  
116 (EB) formation overnight. For LSCs differentiation, EBs were cultured in LSCs  
117 induction medium supplemented with 10 μM SB-505124 and 50 ng/ml FGF-2 for 1  
118 day. Then, medium changed with LSCs induction medium supplemented 25 ng/ml  
119 bone morphogenetic protein 4 (BMP4) (R&D) for 2 days. Thereafter, the induced  
120 cultures were seeded onto plates coated with 0.75 μg/cm<sup>2</sup> LN521 (BIOLAMINA) and  
121 5 μg/cm<sup>2</sup> col IV (Sigma) in a defined and serum-free medium CnT-30 (CELLNTEC).  
122 For next days before collection for scRNA-seq, the cells were maintained in CnT-30  
123 and change the medium every 3 days.

## 124 **scRNA-seq library construction and sequencing**

125 scRNA-seq experiments were performed by Chromium Single Cell 5' Library & Gel  
126 Bead Kit (10x Genomics), according to the manufacturer's protocol. Briefly, cells  
127 were digested with TrypLE™ Select (ThermoFisher Scientific) and single cell  
128 suspension were harvested, washed with PBS twice, and filtered by 40 μm cell  
129 strainers (BD Falcon) before Gel Bead-In Emulsions (GEMs) generation and  
130 barcoding. Single-cell RNA-seq libraries were obtained following the 10x Genomics  
131 recommended protocol, using the reagents included in the kit. Libraries were  
132 sequenced on the BGISEQ-500 (BGI) instrument (Natarajan et al., 2019) using 26  
133 cycles (cell barcode and UMI (Islam et al., 2014) ) for read1 and 108 cycles (sample  
134 index and transcript 5' end) for read2.

## 135 **scRNA-seq Analysis**

## 136 **Quality control**

137 The scRNA-seq data was processed using cellranger-3.0.2 ( [https://support.10x](https://support.10xgenomics.com)  
138 [genomics.com](https://support.10xgenomics.com)) for each sample with default parameters mapping to the human  
139 GRCh38 genome expect the number of recovered cells (--expect-cells option) was set  
140 to 8 000.

141 For each library, we filtered outlier cells using the median absolute deviation from the  
142 median total library size (logarithmic scale), total gene numbers (logarithmic scale),  
143 as well as mitochondrial percentage, as implemented in scran, using a cutoff of 3  
144 (isOutlier, nmads = 3) (Lun et al., 2016). For filtering lowly or none expressed genes,  
145 genes expressed across all the cells detected in less than 10 cells were removed, and  
146 totally 22 501 genes were kept for downstream analysis. Then, clean gene-cell UMI  
147 count matrix was loaded as Seurat object using R package Seurat 3.0 (Macosko et al.,  
148 2015) or cds object using R package monocle 3 (Cao et al., 2019) to manage our  
149 dataset for the further analysis with default parameters otherwise will be mentioned in  
150 detail.

## 151 **Cell cycle phase assignment**

152 To assign cell cycle phase for each cell, cell cycle scores (i.e., G2/M scores and S  
153 scores) and phases (i.e. G1, G2/M, and S) for each cell on the basis of scores using  
154 function CellCycleScoring from R package Seurat based on the expression levels of a  
155 panel of phase-specific marker genes (Nestorowa and Hamey, 2016).

## 156 **Normalization and dimension reduction**

157 The quality control dataset were then analyzed using the Seurat v.3.0 pipeline with

158 NormalizeData function to normalize our data, FindVariableFeatures function to assign  
159 top 2000 highly variably expressed genes, ScaleData function of argument  
160 vars.to.regress to remove confounding sources of variation (variables to regress out  
161 including mitochondrial mapping percentage, number of UMI). Following  
162 normalization and scaling, RunPCA function were performed to capture principal  
163 components using the top 2000 highly variably expressed genes. UMAP was applied  
164 to visualize and explore data in two-dimensional coordinates, generated by  
165 RunUMAP function in Seurat.

#### 166 **Cell cluster**

167 For cell clustering, a graph-based clustering approach (Macosko et al., 2015) were  
168 used to cluster the cells into candidate subpopulations. The first 50 PCs in the data  
169 were applied to construct an SNN matrix using the FindNeighbors function in Seurat  
170 v3 with k.param set to 20. We then identified clusters using the FindClusters  
171 command with the resolution parameter set to 0.5.

#### 172 **Differential Expression Analysis**

173 To find differential expressed genes (DEGs), Wilcoxon Rank Sum test were  
174 performed for significant test using Seurat function FindAllMarkers for every cluster  
175 compared to all remaining cells and FindMarkers for distinguishing each other. Genes  
176 with average natural log fold change more than 0.25 and FDR less than 0.01 were  
177 assigned as DEGs.

#### 178 **Pseudotime trajectories analysis**

179 For pseudotime trajectories analysis, the quality control dataset with cell clustering



180 information were analyzed using the monocle3 (<http://cole-trapnell-lab.github.io/>  
181 monocle3/) pipeline. The new\_cell\_data\_set function in the package was used to  
182 create cds object, and preprocess\_cds function was applied for data normalization and  
183 principal component analysis with num\_dim setting to 50. Then, reduce\_dimension,  
184 cluster\_cells, and learn\_graph functions were used for data reduction, cell clustering,  
185 and pseudotime trajectories construction, respectively. UMAP was applied to  
186 visualize and explore data in two-dimensional coordinates using plot\_cells function.

187

## 188 **Results**

### 189 **Single-cell RNA sequencing revealed expression heterogeneity of hESC-derived**

#### 190 **LSCs**

191 Human embryonic stem cell (H9) was used to differentiate to LSCs via a surface  
192 ectodermal stage (Hongisto et al., 2017; Mikhailova et al., 2014) (Fig S1A). To  
193 characterize obtained hESC-derived LSCs, we performed scRNA-seq at four time  
194 points, Day 0 before induction, Day 7, Day 14, and Day 21 after induction. In total,  
195 18541 cells were sequenced, and data from 14241 cells were used for the following  
196 analysis after filtering out low quality cells, including 4687 cells, 4784 cells, 3210  
197 cells, and 1560 cells from Day 0, Day 7, Day 14, and Day 21, respectively (Fig  
198 S1B-S1E).

199 Gene expression analysis showed that, at Day 0, POU5F1, SOX2, and NANOG were  
200 highly expressed in most cells, accounting for 99.98 %, 99.73 %, and 82.27% of all

201 the analyzed cells, respectively (Fig 1A and 1E), which indicated that these cells used  
202 for hESC-derived LSCs differentiation were pluripotent.

203 At Day 7, 94.25% of cells expressed transcription factor TFAP2A while only a few of  
204 the cells expressed pluripotency markers (POU5F1 (0.57%), SOX2 (1.94%), and  
205 NANOG (0.14%)) neuroectodermal markers (SOX1 (0.00%) and PAX6 (0.24%)),  
206 neural crest marker SOX10 (0.04%), and cranial placode marker SIX1 (0.32%) (Fig  
207 1A, 1B and 1E), demonstrating the residual pluripotency and a direction of  
208 differentiation toward surface ectodermal progenitors (Tchieu et al., 2017). In addition,  
209 a range of both epithelial progenitor and candidate LSCs markers (Gonzalez et al.,  
210 2018), such as KRT19, KRT18, TP63 (p63), CDH1, and ABCG2, were expressed in  
211 this population. However, some of these genes showed high expression variability  
212 between clusters (Fig 1B, 1C and 1E). For example, TP63 (well-known as p63),  
213 which has been linked to successful limbal transplantation (Rama et al., 2010),  
214 expressed in a small portion of cells (6.034%) (Fig 1E).

215 At Day 14 and Day 21, we found the expression of epithelial progenitor and  
216 candidate LSCs markers were highly variable as well. Percentage of cells expressing  
217 TP63 decreased from 11.21% at Day 14 to 2.46% at Day 21 (Fig 1E). In contrast,  
218 most cells (85.67%) at Day 21 expressed ABCG2, one of the widely used makers of  
219 LSCs (Budak et al., 2005; de Paiva et al., 2005; Gonzalez et al., 2018; Vattulainen et  
220 al., 2019), while only 21.82% of cells at Day 14 had ABCG2 expression. Furthermore,  
221 several markers of terminally differentiated LSCs, such as KRT3 and KRT12, were  
222 not detected in any cells at Day 14 and Day 21, indicating that these cells were still at

223 immature differentiation stages.

224 **Time-course Single-cell RNA-seq profiling showed specific changes of gene**  
225 **expression during hESCs-LSCs differentiation**

226 To investigate transcriptional changes during hESCs-LSCs differentiation, we  
227 integrated data from the four time points for dimension reduction and visualization.  
228 Results showed that all cells were grouped into 11 clusters (Figure 2A). Among the  
229 clusters, cluster 2 and 3 are all from Day 0 (Figure 2B). Not surprisingly, these cells  
230 exhibited highest expression of pluripotent genes POU5F1, SOX2, NANOG, and  
231 DNMT3B (Fig 2D). In contrast, expression of surface ectodermal genes, such as  
232 TFAP2A, TFAP2B, TFAP2C, HAND1, GATA3, IFR6, WISP1, and NR2F2, were  
233 upregulated throughout differentiation (Figures 2D). Unexpectedly, epithelial genes  
234 such as CDH1, EPCAM, KRT8, and KRT18, were lowly expressed in cluster 1, while  
235 mesenchymal genes such as CDH2, COL1A1, COL1A2, and FBN1 were highly  
236 expressed, indicating that cluster 1 were mesenchymal cells. In addition, neural genes  
237 such as COL2A1, SOX11, OTX1 and SIX1 were upregulated in cluster 9. Also, cells  
238 from Day 0 and Day 21 were separated, whereas some cells from Day 7 and Day 14  
239 were clustered with each other (Figure 2A and 2B), indicating these cells at Day 7 and  
240 Day 14 had similar expression profiles. Therefore, these results demonstrated that  
241 during hESCs to LSCs differentiation, hESCs gave rise to cells with none epithelial  
242 characteristics.

243 Notably, differential gene expression (DGE) analysis showed that genes related  
244 to cell cycle and programmed cell death were highly expressed in cluster 8 and cluster

245 4, respectively (Fig 2D). In cluster 8, expression of genes such as TOP2A, MKI67,  
246 TPX2, BUB1B, and CEP55 were significantly upregulated, while SQSTM1, DDIT3,  
247 PPP1R15A, H1F0, and TRIB3 etc. showed higher expression in cluster 4 (Fig 2D). To  
248 avoid the potential bias from cell cycle effects, we assigned cell cycle phase to each  
249 cell. Then, we only extract cells in clusters with G2M phase to compared cycle related  
250 genes expression. Results demonstrated that cycle related genes, such as TOP2A,  
251 MKI67, TPX2, BUB1B, and CEP55 ect., were highly expressed in cluster 8 as well  
252 (Fig S2D and S2E). These results demonstrated that no obvious cell cycle effects on  
253 data dimension reduction, and cell cycle effects did not obviously impact cell  
254 clustering, and cluster 8 are indeed highly expanding cells.

255 Next, we investigated expression of several putative LSC-associated markers  
256 (e.g. KRT19, ABCG2, VIM, ITGA9, TP63, KRT14, KRT15, KRT5) and  
257 differentiation-associated markers (e.g. KRT3 and KRT12) (Gonzalez et al., 2018;  
258 Schlotzer-Schrehardt and Kruse, 2005) during hESC-LSCs differentiation. Results  
259 shown that differentiation-associated markers KRT3 and KRT12 were not detected in  
260 all clusters. Interestingly, putative LSC-associated markers TP63 and KRT14 were  
261 highly expressed in cluster 7 while KRT19 and ABCG2 were upregulated in all the  
262 clusters except cluster 1 (Fig 2C and 2D). Taken together, these results indicated that  
263 cells in cluster 0, cluster 5, cluster 6, cluster 7, cluster 8, and cluster 10 could be  
264 progenitors of LSCs, LSCs and their progeny in the different stages of development.

#### 265 **Pseudotime analysis revealed unique hESC-LSCs developmental trajectory**

266 To investigate hESC-LSCs developmental trajectory, we performed pseudotime

267 analysis to study the path and progress of individual cells undergoing hESCs-derived  
268 LSCs differentiation (Trapnell et al., 2014). The resultant trajectory indicated that a  
269 trifurcation point in cluster 0 could lead to cells fate commitment toward cluster 1  
270 (Branch 1), cluster 4 (Branch 2), and cluster 8 that further differentiate to cells in  
271 cluster 7, 10, 5 and 6 (Branch 3) (Fig 3A and 3B).

272 In Branch 1, CDH1 (E-cadherin) and CDH2 (N-cadherin), two well-known  
273 cadherins, were differently expressed between cells in cluster 0 and cluster 1 (Fig S3B  
274 and S3C). Specifically, CDH1 was upregulated in cluster 0 while CDH2 was  
275 expressed significantly higher in cluster 1. The loss of epithelial surface marker  
276 CDH1 and the acquisition of mesenchymal marker CDH2 is considered as the  
277 hallmark of epithelial-mesenchymal transition (EMT), which play pivotal role in  
278 developmental regulation, such as Neural Crest Formation (Kim et al., 2017).  
279 Additionally, upregulated genes in cluster 1 compared to cluster 0 were  
280 overrepresented significantly in nervous system development (Fig S3D), indicating  
281 the possible generation of neural crest like cells during the hESCs to LSCs  
282 differentiation process. In Branch 2, cells were undergoing programmed cells death  
283 (apoptosis) as mentioned in above section (Figure S3D). Apoptosis is a positive  
284 regulator of stem cells populations, it plays fundamental roles in development and  
285 tissue homeostasis (Fuchs and Steller, 2011; Kaplan et al., 2019). Branch 3 identified  
286 the main hESC-LSCs developmental trajectory. Epithelium development and  
287 epithelial cell proliferation related genes were upregulated in the Branch 3  
288 differentiation process (Figure S3D). Increasing expression of candidate LSC markers

289 KRT19, ABCG2, KRT14, and TP63 were seen in cluster 5, cluster 6, and cluster 7  
290 (Figure 2C). Pseudotime analysis further demonstrated that these candidate markers  
291 exhibiting different trajectory patterns in Branch 3 (Figure 3C). In addition, some  
292 transcription factors (TFs), such as CEBPD, GATA3, HAND1, and TFAP2A, were  
293 upregulated upon differentiation and stably expressed at high level (Figure 3D), while  
294 some TFs, such as AHR, IRX4, TFAP2B, and ZNF530, only upregulated in a certain  
295 period of time like TP63 (Figure 3C,E), indicating their distinct roles in hESC-LSCs  
296 development. Interestingly, cell cycle related genes, such as CCNB1, CDC20, MKI67,  
297 and TOP2A, shown regular oscillations patterns across hESC-LSCs developmental  
298 pseudotime to regulate the cell proliferation (Fig 3F).

### 299 **Transcriptional difference of subpopulations in hESCs-derived LSCs**

300 In the pseudotime analysis, cluster 7 expressed most reported candidate LSC markers,  
301 including TP63 (Pellegrini et al., 2001), KRT14 (Kurpakus et al., 1994), KRT15  
302 (Yoshida et al., 2006), ITGA6 (Hayashi et al., 2008) etc. (Figure S4A). To investigate  
303 expression differences among subpopulations in hESCs-derived LSCs, we performed  
304 two-two comparisons among cluster 5, cluster 6, and cluster 7 (Figure S4B).  
305 Differential expression analysis demonstrated that upregulated genes in cluster 5 and  
306 cluster 6 population shown significant enrichment in cell cycle process. In addition,  
307 genes involved in cell migration regulation were highly expressed in cluster 5  
308 compared to cluster 6, including cadherin genes CDH5 and CDH13, Integrin genes  
309 ITGA2, ITGA6, ITGA3, ITGB6, ITGB1, ITGA5 and ITGAV, collagen genes  
310 COL4A1, COL4A2, COL1A2 and COL3A1, and transcription factors SOX9, MYC,

311 STAT3 ect. “X, Y, Z hypothesis” of corneal epithelial maintenance suggested that  
312 proliferation of basal cells (X) and migration of centripetal cells replace cells’ lost  
313 from the ocular surface (Z) to support the corneal epithelial homeostasis (Thoft and  
314 Friend, 1983), indicating cellular and functional variables for corneal epithelial  
315 balance. Within the cornea, nuclear p63 (TP63) is expressed by the basal cells of the  
316 limbal epithelium, but not by TA cells covering the corneal surface (Pellegrini et al.,  
317 2001). Therefore, these results suggested that cells in cluster 7 (TP63 expression) give  
318 rise to cells (TACs) in cluster 5 and cluster 6, both of which are the progeny of LSCs  
319 exhibiting high, but limited proliferative activity (Beebe and Masters, 1996; Pellegrini  
320 et al., 2001).

321 To identify potential markers to distinguish these cells, we focused on  
322 transcription factors (TFs) and cluster of differentiation (CD) genes differentially  
323 expressed in cells in cluster 5, cluster 6, and cluster 7. Among the TFs that play key  
324 roles in cell fate decision, CXXC5, IRF6, SKIL, RUNX1 etc. as well as TP63 were  
325 upregulated in cluster 7. GATA3, EPAS1, HAND1, HOXB2, and CEBPD ect. were  
326 highly expressed in cluster 6, while NFE2L3, EVT4, YBX1, FOSL1, and MYC ect.  
327 were enriched in cluster 5 (Fig 4D). As to the CD genes, SDC1, ITGB4, CD9, IGF1R,  
328 JAG1, CD46, CD151 ect. were highly expressed in cluster 7, while LIFR, CD99,  
329 FGFR2, ABCG2 etc. were upregulated in cluster 6, and ENPEP, THY1, CD40, CD44,  
330 CDH5 etc. exhibited highest expression in cluster 5 (Fig 4E). All these candidate  
331 markers identified here would be valuable for future characterization of different cell  
332 types in human cornea.

## 333 **Discussion**

334 In this study, we performed a time-course single-cell transcriptome profiling of  
335 hESC-derived LSCs, and revealed the gene expression patterns and LSCs  
336 developmental trajectory. Previous studies showed that *bona fide* LSCs have the  
337 potential to establish and maintain long-term corneal repair. Many studies have  
338 investigated the identity of human LSCs and several candidate LSCs markers have  
339 been identified, such as TP63 (well-known as p63) (Pellegrini et al., 2001), KRT14  
340 (Kurpakus et al., 1994) , ITGA6 (Hayashi et al., 2008), NTRK1 (Qi et al., 2008),  
341 ABCG2 (Budak et al., 2005; de Paiva et al., 2005), KRT15 (Yoshida et al., 2006),  
342 ABCB5 (Ksander et al., 2014). Besides, the terminally differentiated markers KRT3  
343 and KRT12 were absent in LSCs (Gonzalez et al., 2018; Schermer et al., 1986).  
344 However, according to our single cell expression profiling data, hESC-derived LSCs  
345 showed significantly cellular heterogeneity using current protocols. For example,  
346 TP63 expressed cells only accounted for 11.21% of cells at Day 14 and 2.46% at Day  
347 21 (Fig 1E). Therefore, our data suggested that the heterogenic subpopulations should  
348 be further characterized and the current hESCs-LSCs differentiation methods need to  
349 be optimized accordingly.

350       Until recently, the developmental origin of LSCs remained elusive (Gonzalez et  
351 al., 2018), and LSCs could be developmental descendants of the surface ectoderm as  
352 well as the periocular mesenchyme. Our scRNA-seq data revealed that EMT program  
353 were activated in the cluster of cells with neural crest characteristics at early  
354 hESC-LSCs differentiation stage. During organogenesis, epithelial cells can give rise



355 to mesenchymal cells through EMT while the reverse process,  
356 mesenchymal–epithelial transition (MET), can similarly generate epithelial cells (Pei  
357 et al., 2019), suggesting LSCs could be differentiated from the perocular  
358 mesenchyme through MET. However, our pseudotime trajectory analysis showed that  
359 induced mesenchymal cells did not generate LSCs under current culture conditions,  
360 and whether the perocular mesenchyme could give rise LSCs remain to be confirmed.  
361 Meanwhile, we found excessive cell death occurred in cells cultured in the medium  
362 beyond 20 days, indicating the medium used need to be improved for LSCs  
363 generation. Nevertheless, our pseudotime analysis identified a hESC-LSCs  
364 developmental trajectory. During organogenesis, cell cycle modulation is important  
365 for cell fate determination (Budirahardja and Gonczy, 2009). According to our  
366 trajectory, cell cycle related genes, such as CCNB1, CDC20, MKI67, and TOP2A,  
367 showed variable expression across hESC-LSCs developmental pseudotime (Fig 3F).

368 For long term restoration of visual function caused by LSCD, LSCs based  
369 transplantation either through autologous or allogenic grafting of limbal tissue, or  
370 cultured and expanded limbal cells have already shown effectiveness in the  
371 treatment (Atallah et al., 2016). However, so far, only TP63 positive LSC cells were  
372 reported to be associated with therapeutic success (Rama et al., 2010). But TP63  
373 could not be applied to sort pure population of LSCs, and isolation of pure LSCs is  
374 still the bottleneck concerning the clinical application of LSCs. Therefore, other  
375 molecular markers are needed for successful prospective enrichment of LSC cells  
376 capable of long-term corneal restoration (Gonzalez et al., 2018). Identification of

377 specific biomarkers for isolating and characterizing LSCs is crucial for both  
378 understanding their basic biology and translating in clinical application (Gonzalez et  
379 al., 2018; Sonam et al., 2019). According to our scRNA-seq data, TP63 expressed  
380 LSCs showed relative quiescence compared to their progeny, and genes related to cell  
381 cycle were significantly upregulated in highly proliferative progeny (TACs), which  
382 are in line with previous reports that epithelial stem cells are relatively quiescent and  
383 give rise to TACs (Lavker and Sun, 2003). Besides reported markers - TP63 and  
384 ITGA6, TFs such as CXXC5, IRF6, SKIL, NR2F2, IRX4 etc., and CD genes such as  
385 SDC1, CD9, IGF1R, ALCAM etc., were newly identified as potential markers that  
386 highly expressed in hESC-derived LSCs (Fig 4C and 4D). Thus, these data provided  
387 valuable sources for characterization of LSCs and optimization of hESC-LSCs  
388 differentiation protocols.

389 In summary, we studied the time-course changes during hESC-LSC  
390 differentiation *in vitro* at single-cell level, and revealed significant transcriptional  
391 heterogeneity. Based on current protocol in this study, expression heterogeneity of  
392 reported LSC markers were identified in subpopulations of differentiated cells. EMT  
393 has been shown to occur during differentiation process, which could possibly result in  
394 generation of untargeted cells. Pseudotime trajectory revealed transcriptional changes  
395 and signatures of commitment for LSCs and their progeny (TACs) that derived from  
396 pluripotent stem cells. Furthermore, some new potential makers for LSCs were  
397 identified, which are valuable for future investigation of elucidating identity and  
398 developmental origin of human LSCs.

399 **Data accession**

400 The data that support the findings of this study have been deposited into CNGB  
401 Sequence Archive (CNSA) (Guo et al., 2020) of China National GeneBank  
402 DataBase (CNGBdb)(F.; et al., 2020) with accession number CNP0001218.

403 **Author Contributions**

404 Conceptualization, C.S., and X.Z.; Methodology and Investigation, C.S., H.W.,  
405 Q.M., C.C., J.Y. and X.Z. Writing, C.S., H.L., B.L., and X.Z.; Funding Acquisition,  
406 B.L., and X.Z.

407 **ACKNOWLEDGMENTS**

408 This work was supported by Science, Technology and Innovation Commission of  
409 Shenzhen Municipality under grant No. KQJSCX20170322143848413 to X.Z. and  
410 Shenzhen Municipal Government of China under grant No. 20170731162715261 to  
411 B. L. The funders had no role in study design, data collection and analysis, decision  
412 to publish, or preparation of the manuscript. It was also supported by  
413 BGI-Shenzhen. We thank members of China National GeneBank for technical  
414 support.

415 **Competing interests**

416 The authors declare that they have no competing interests.

## 417 **Reference**

- 418 Ahmad, S., Stewart, R., Yung, S., Kolli, S., Armstrong, L., Stojkovic, M., Figueiredo, F., and  
419 Lako, M. (2007). Differentiation of human embryonic stem cells into corneal epithelial-like cells  
420 by in vitro replication of the corneal epithelial stem cell niche. *Stem Cells* *25*, 1145-1155.
- 421 Atallah, M.R., Palioura, S., Perez, V.L., and Amescua, G. (2016). Limbal stem cell  
422 transplantation: current perspectives. *Clinical Ophthalmology (Auckland, NZ)* *10*, 593-602.
- 423 Barut Selver, O., Yagci, A., Egrilmez, S., Gurdal, M., Palamar, M., Cavusoglu, T., Ates, U.,  
424 Veral, A., Guven, C., and Wolosin, J.M. (2017). Limbal Stem Cell Deficiency and Treatment  
425 with Stem Cell Transplantation. *Turk J Ophthalmol* *47*, 285-291.
- 426 Beebe, D.C., and Masters, B.R. (1996). Cell lineage and the differentiation of corneal epithelial  
427 cells. *Investigative Ophthalmology and Visual Science* *37*, 1815-1825.
- 428 Budak, M.T., Alpdogan, O.S., Zhou, M., Lavker, R.M., Akinci, M.A., and Wolosin, J.M. (2005).  
429 Ocular surface epithelia contain ABCG2-dependent side population cells exhibiting features  
430 associated with stem cells. *Journal of Cell Science* *118*, 1715-1724.
- 431 Budirahardja, Y., and Gonczy, P. (2009). Coupling the cell cycle to development. *Development*  
432 *136*, 2861-2872.
- 433 Busin, M., Breda, C., Bertolin, M., Bovone, C., Ponzin, D., Ferrari, S., Barbaro, V., and  
434 Elbadawy, H.M. (2016). Corneal Epithelial Stem Cells Repopulate the Donor Area within 1  
435 Year from Limbus Removal for Limbal Autograft. *Ophthalmology* *123*, 2481-2488.
- 436 Cao, J., Spielmann, M., Qiu, X., Huang, X., Ibrahim, D.M., Hill, A.J., Zhang, F., Mundlos, S.,  
437 Christiansen, L., Steemers, F.J., *et al.* (2019). The single-cell transcriptional landscape of  
438 mammalian organogenesis. *Nature* *566*, 496-502.

439 Chakrabarty, K., Shetty, R., and Ghosh, A. (2018). Corneal cell therapy: with iPSCs, it is no  
440 more a far-sight. *Stem Cell Research & Therapy* *9*, 287.

441 Clark, B.S., Stein-O'Brien, G.L., Shiao, F., Cannon, G.H., Davis-Marcisak, E., Sherman, T.,  
442 Santiago, C.P., Hoang, T.V., Rajaii, F., James-Esposito, R.E., *et al.* (2019). Single-Cell  
443 RNA-Seq Analysis of Retinal Development Identifies NFI Factors as Regulating Mitotic Exit  
444 and Late-Born Cell Specification. *Neuron* *102*, 1111-1126 e1115.

445 Davanger, M., and Evensen, A. (1971). Role of the pericorneal papillary structure in renewal of  
446 corneal epithelium. *Nature* *229*, 560-561.

447 de Paiva, C.S., Chen, Z., Corrales, R.M., Pflugfelder, S.C., and Li, D.Q. (2005). ABCG2  
448 transporter identifies a population of clonogenic human limbal epithelial cells. *Stem Cells* *23*,  
449 63-73.

450 Ebrahimi, M., Taghi-Abadi, E., and Baharvand, H. (2009). Limbal stem cells in review. *J*  
451 *Ophthalmic Vis Res* *4*, 40-58.

452 F., C., L., Y., F., Y., L., W., X., G., F., G., C., H., C., T., L., F., R., S., *et al.* (2020).  
453 CNGBdb: China National GeneBank DataBase. *Hereditas(Beijing)* *42*, 799-809.

454 Fuchs, Y., and Steller, H. (2011). Programmed cell death in animal development and disease.  
455 *Cell* *147*, 742-758.

456 Gonzalez, G., Sasamoto, Y., Ksander, B.R., Frank, M.H., and Frank, N.Y. (2018). Limbal stem  
457 cells: identity, developmental origin, and therapeutic potential. *Wiley Interdiscip Rev Dev Biol*  
458 *7*.

459 Guo, X., Chen, F., Gao, F., Li, L., Liu, K., You, L., Hua, C., Yang, F., Liu, W., Peng, C., *et al.*  
460 (2020). CNSA: a data repository for archiving omics data. *Database (Oxford)* *2020*.

461 Gurtner, G.C., Hwang, B., Lee, J.H., and Bang, D. (2018). Single-cell RNA sequencing  
462 technologies and bioinformatics pipelines. *Stem Cells* *50*, 96.

463 Hanson, C., Hardarson, T., Ellerstrom, C., Nordberg, M., Caisander, G., Rao, M., Hyllner, J.,  
464 and Stenevi, U. (2013). Transplantation of human embryonic stem cells onto a partially  
465 wounded human cornea in vitro. *Acta Ophthalmol* *91*, 127-130.

466 Hayashi, R., Ishikawa, Y., Sasamoto, Y., Katori, R., Nomura, N., Ichikawa, T., Araki, S., Soma,  
467 T., Kawasaki, S., Sekiguchi, K., *et al.* (2016). Co-ordinated ocular development from human  
468 iPS cells and recovery of corneal function. *Nature* *531*, 376-380.

469 Hayashi, R., Yamato, M., Saito, T., Oshima, T., Okano, T., Tano, Y., and Nishida, K. (2008).  
470 Enrichment of corneal epithelial stem/progenitor cells using cell surface markers, integrin  
471 alpha6 and CD71. *Biochemical and Biophysical Research Communications* *367*, 256-263.

472 Hongisto, H., Ilmarinen, T., Vattulainen, M., Mikhailova, A., and Skottman, H. (2017). Xeno-  
473 and feeder-free differentiation of human pluripotent stem cells to two distinct ocular epithelial  
474 cell types using simple modifications of one method. *Stem Cell Research & Therapy* *8*, 291.

475 Hu, Y., Wang, X., Hu, B., Mao, Y., Chen, Y., Yan, L., Yong, J., Dong, J., Wei, Y., Wang, W., *et*  
476 *al.* (2019). Dissecting the transcriptome landscape of the human fetal neural retina and retinal  
477 pigment epithelium by single-cell RNA-seq analysis. *PLoS Biology* *17*, e3000365.

478 Islam, S., Zeisel, A., Joost, S., La Manno, G., Zajac, P., Kasper, M., Lonnerberg, P., and  
479 Linnarsson, S. (2014). Quantitative single-cell RNA-seq with unique molecular identifiers. *Nat*  
480 *Methods* *11*, 163-166.

481 Kamarudin, T.A., Bojic, S., Collin, J., Yu, M., Alharthi, S., Buck, H., Shortt, A., Armstrong, L.,  
482 Figueiredo, F.C., and Lako, M. (2018). Differences in the Activity of Endogenous Bone

483 Morphogenetic Protein Signaling Impact on the Ability of Induced Pluripotent Stem Cells to  
484 Differentiate to Corneal Epithelial-Like Cells. *Stem Cells* *36*, 337-348.

485 Kaplan, N., Wang, J., Wray, B., Patel, P., Yang, W., Peng, H., and Lavker, R.M. (2019).  
486 Single-Cell RNA Transcriptome Helps Define the Limbal/Corneal Epithelial Stem/Early Transit  
487 Amplifying Cells and How Autophagy Affects This Population. *Investigative Ophthalmology*  
488 and *Visual Science* *60*, 3570-3583.

489 Kawakita, T., Higa, K., Shimmura, S., Tomita, M., Tsubota, K., and Shimazaki, J. (2011). Fate  
490 of corneal epithelial cells separated from limbus in vivo. *Investigative Ophthalmology and*  
491 *Visual Science* *52*, 8132-8137.

492 Kim, D.H., Xing, T., Yang, Z., Dudek, R., Lu, Q., and Chen, Y.H. (2017). Epithelial  
493 Mesenchymal Transition in Embryonic Development, Tissue Repair and Cancer: A  
494 Comprehensive Overview. *J Clin Med* *7*.

495 Kim, K.H., and Mian, S.I. (2017). Diagnosis of corneal limbal stem cell deficiency. *Current*  
496 *Opinion in Ophthalmology* *28*, 355-362.

497 Ksander, B.R., Kolovou, P.E., Wilson, B.J., Saab, K.R., Guo, Q., Ma, J., McGuire, S.P.,  
498 Gregory, M.S., Vincent, W.J., Perez, V.L., *et al.* (2014). ABCB5 is a limbal stem cell gene  
499 required for corneal development and repair. *Nature* *511*, 353-357.

500 Kurpakus, M.A., Maniaci, M.T., and Esco, M. (1994). Expression of keratins K12, K4 and K14  
501 during development of ocular surface epithelium. *Current Eye Research* *13*, 805-814.

502 Lavker, R.M., and Sun, T.T. (2003). Epithelial stem cells: the eye provides a vision. *Eye (Lond)*  
503 *17*, 937-942.

504 Le, Q., Xu, J., and Deng, S.X. (2018). The diagnosis of limbal stem cell deficiency. *Ocul Surf*

505 16, 58-69.

506 Lun, A.T., McCarthy, D.J., and Marioni, J.C. (2016). A step-by-step workflow for low-level  
507 analysis of single-cell RNA-seq data with Bioconductor. *F1000Res* 5, 2122.

508 Macosko, E.Z., Basu, A., Satija, R., Nemesh, J., Shekhar, K., Goldman, M., Tirosh, I., Bialas,  
509 A.R., Kamitaki, N., Martersteck, E.M., *et al.* (2015). Highly Parallel Genome-wide Expression  
510 Profiling of Individual Cells Using Nanoliter Droplets. *Cell* 161, 1202-1214.

511 Mikhailova, A., Ilmarinen, T., Uusitalo, H., and Skottman, H. (2014). Small-molecule induction  
512 promotes corneal epithelial cell differentiation from human induced pluripotent stem cells.  
513 *Stem Cell Reports* 2, 219-231.

514 Natarajan, K.N., Miao, Z., Jiang, M., Huang, X., Zhou, H., Xie, J., Wang, C., Qin, S., Zhao, Z.,  
515 Wu, L., *et al.* (2019). Comparative analysis of sequencing technologies for single-cell  
516 transcriptomics. *Genome Biology* 20, 70.

517 Nestorowa, S., and Hamey, F.K. (2016). A single-cell resolution map of mouse hematopoietic  
518 stem and progenitor cell differentiation. *128*, e20-31.

519 Pattison, J.M., Melo, S.P., Piekos, S.N., Torkelson, J.L., Bashkirova, E., Mumbach, M.R.,  
520 Rajasingh, C., Zhen, H.H., Li, L., Liaw, E., *et al.* (2018). Retinoic acid and BMP4 cooperate  
521 with p63 to alter chromatin dynamics during surface epithelial commitment. *Nature Genetics*  
522 50, 1658-1665.

523 Pei, D., Shu, X., Gassama-Diagne, A., and Thiery, J.P. (2019). Mesenchymal-epithelial  
524 transition in development and reprogramming. *Nature Cell Biology* 21, 44-53.

525 Pellegrini, G., Dellambra, E., Golisano, O., Martinelli, E., Fantozzi, I., Bondanza, S., Ponzin, D.,  
526 McKeon, F., and De Luca, M. (2001). p63 identifies keratinocyte stem cells. *Proceedings of the*



527 National Academy of Sciences of the United States of America *98*, 3156-3161.

528 Qi, H., Li, D.Q., Shine, H.D., Chen, Z., Yoon, K.C., Jones, D.B., and Pflugfelder, S.C. (2008).

529 Nerve growth factor and its receptor TrkA serve as potential markers for human corneal

530 epithelial progenitor cells. *Experimental Eye Research* *86*, 34-40.

531 Rama, P., Matuska, S., Paganoni, G., Spinelli, A., De Luca, M., and Pellegrini, G. (2010).

532 Limbal stem-cell therapy and long-term corneal regeneration. *New England Journal of*

533 *Medicine* *363*, 147-155.

534 Rossant, J. (2015). Mouse and human blastocyst-derived stem cells: vive les differences.

535 *Development* *142*, 9-12.

536 Schermer, A., Galvin, S., and Sun, T.T. (1986). Differentiation-related expression of a major

537 64K corneal keratin in vivo and in culture suggests limbal location of corneal epithelial stem

538 cells. *Journal of Cell Biology* *103*, 49-62.

539 Schlotzer-Schrehardt, U., and Kruse, F.E. (2005). Identification and characterization of limbal

540 stem cells. *Experimental Eye Research* *81*, 247-264.

541 Sonam, S., Srnak, J.A., Perry, K.J., and Henry, J.J. (2019). Molecular markers for corneal

542 epithelial cells in larval vs. adult *Xenopus* frogs. *Experimental Eye Research* *184*, 107-125.

543 Su, X., Shi, Y., Zou, X., Lu, Z.N., Xie, G., Yang, J.Y.H., Wu, C.C., Cui, X.F., He, K.Y., Luo, Q.,

544 *et al.* (2017). Single-cell RNA-Seq analysis reveals dynamic trajectories during mouse liver

545 development. *BMC Genomics* *18*, 946.

546 Sun, C., Zhang, J., Zheng, D., Wang, J., Yang, H., and Zhang, X. (2018). Transcriptome

547 variations among human embryonic stem cell lines are associated with their differentiation

548 propensity. *PloS One* *13*, e0192625.

549 Tang, F., Barbacioru, C., Wang, Y., Nordman, E., Lee, C., Xu, N., Wang, X., Bodeau, J., Tuch,  
550 B.B., Siddiqui, A., *et al.* (2009). mRNA-Seq whole-transcriptome analysis of a single cell. *Nat*  
551 *Methods* *6*, 377-382.

552 Tchieu, J., Zimmer, B., Fattahi, F., Amin, S., Zeltner, N., Chen, S., and Studer, L. (2017). A  
553 Modular Platform for Differentiation of Human PSCs into All Major Ectodermal Lineages. *Cell*  
554 *Stem Cell* *21*, 399-410 e397.

555 Thoft, R.A., and Friend, J. (1983). The X, Y, Z hypothesis of corneal epithelial maintenance.  
556 *Investigative Ophthalmology and Visual Science* *24*, 1442-1443.

557 Trapnell, C., Cacchiarelli, D., Grimsby, J., Pokharel, P., Li, S., Morse, M., Lennon, N.J., Livak,  
558 K.J., Mikkelsen, T.S., and Rinn, J.L. (2014). The dynamics and regulators of cell fate decisions  
559 are revealed by pseudotemporal ordering of single cells. *Nature Biotechnology* *32*, 381-386.

560 Vattulainen, M., Ilmarinen, T., Koivusalo, L., Viiri, K., Hongisto, H., and Skottman, H. (2019).  
561 Modulation of Wnt/BMP pathways during corneal differentiation of hPSC maintains  
562 ABCG2-positive LSC population that demonstrates increased regenerative potential. *Stem*  
563 *Cell Research & Therapy* *10*, 236.

564 Wolosin, J.M., Budak, M.T., and Akinci, M.A. (2004). Ocular surface epithelial and stem cell  
565 development. *International Journal of Developmental Biology* *48*, 981-991.

566 Yoshida, S., Shimmura, S., Kawakita, T., Miyashita, H., Den, S., Shimazaki, J., and Tsubota, K.  
567 (2006). Cytokeratin 15 can be used to identify the limbal phenotype in normal and diseased  
568 ocular surfaces. *Investigative Ophthalmology and Visual Science* *47*, 4780-4786.

569  
570  
571  
572

573

574

575

576

577

578

579

580

581

582

583

584

585

586

587

588

589

590

591

592

593

594

595

596 Figures

597

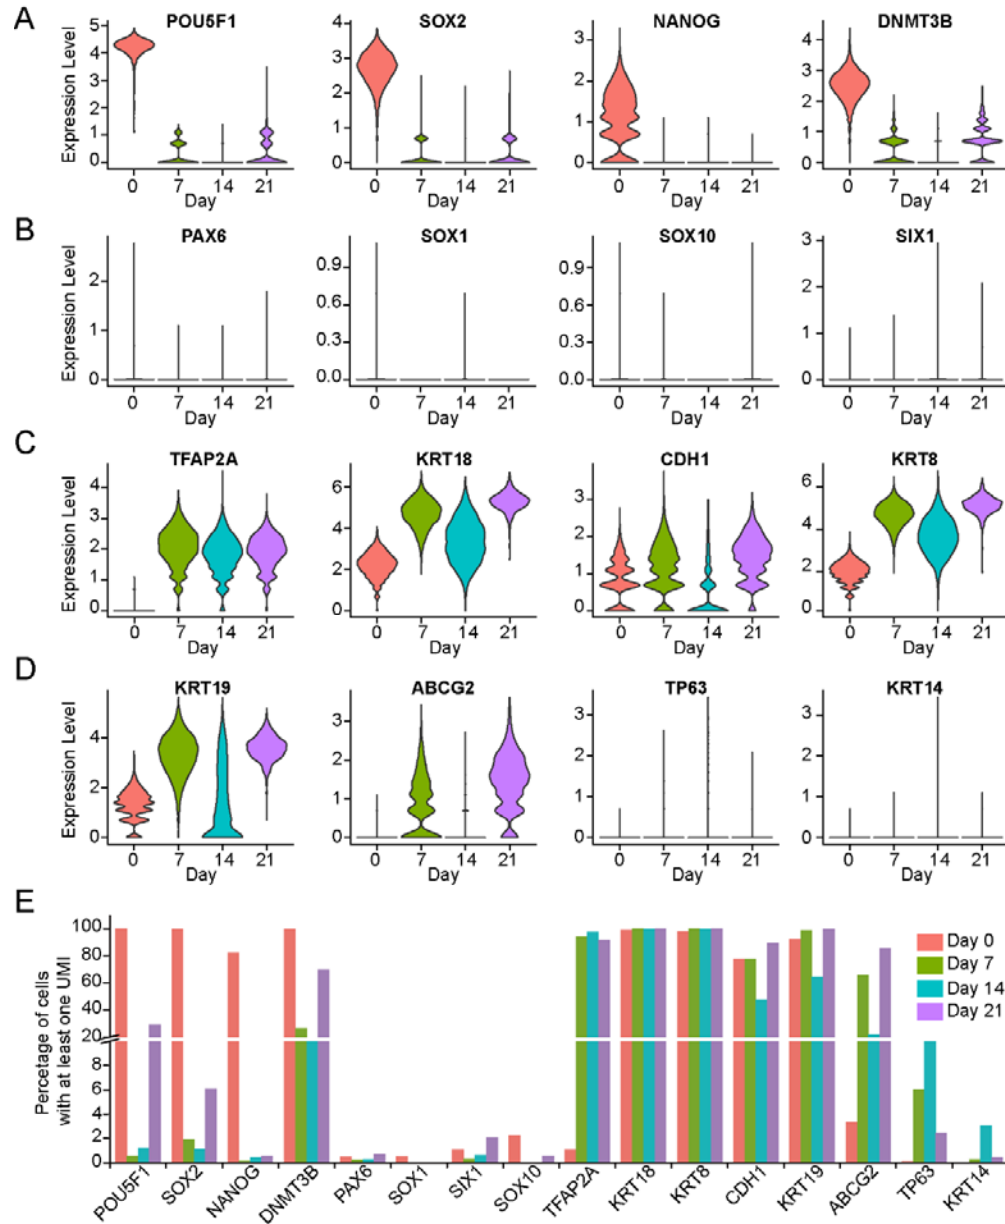

598

599 **Fig 1. Single-cell RNA sequencing analysis of human embryonic stem cells-derived LSCs**  
 600 **differentiation at different time point**

601 (A-D) Violin plot representing expression of pluripotency (A), neural ectoderm (B), surface ectoderm  
 602 and epithelium (C), and candidate LSCs (D) markers at the four times. (E) Barplot representing  
 603 percentage of cells expressed the selected pluripotency, neural ectoderm, surface ectoderm and  
 604 epithelium, and candidate LSCs markers at the four times.

605

606

607

608

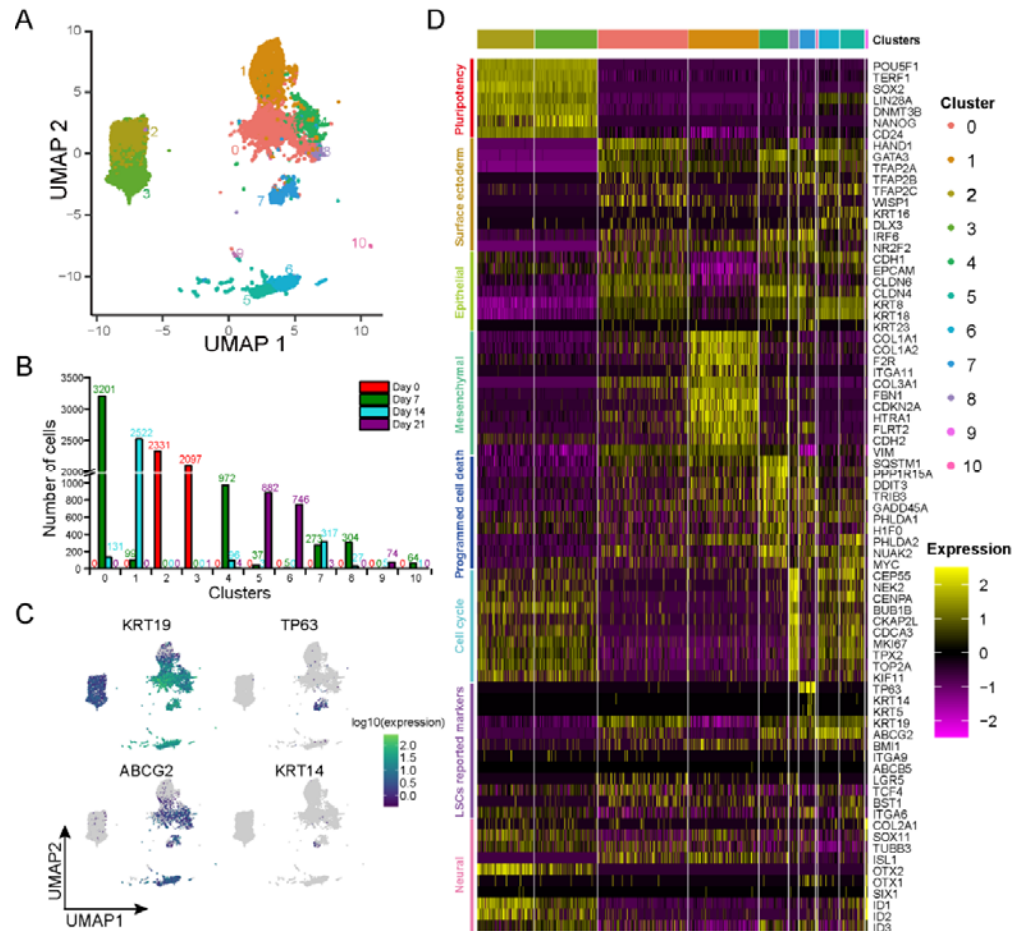

609

610 **Figure 2. Time-course Single-cell RNA sequencing profiling reveals heterogeneity by current**

611 **hESCs-derived LSCs differentiation method**

612 (A) UMAP visualizing the results of clustering for cells sequenced at the four times. (B) Barplot

613 showing number of cells in the four days for each cluster. (C) Feature plots visualizing the four key

614 LSCs marker genes expression in the cells. (D) Heatmap representing genes differentially expressed

615 among the clusters.

616

617

618

619

620

621

622

623

624

625

626

627

628

629

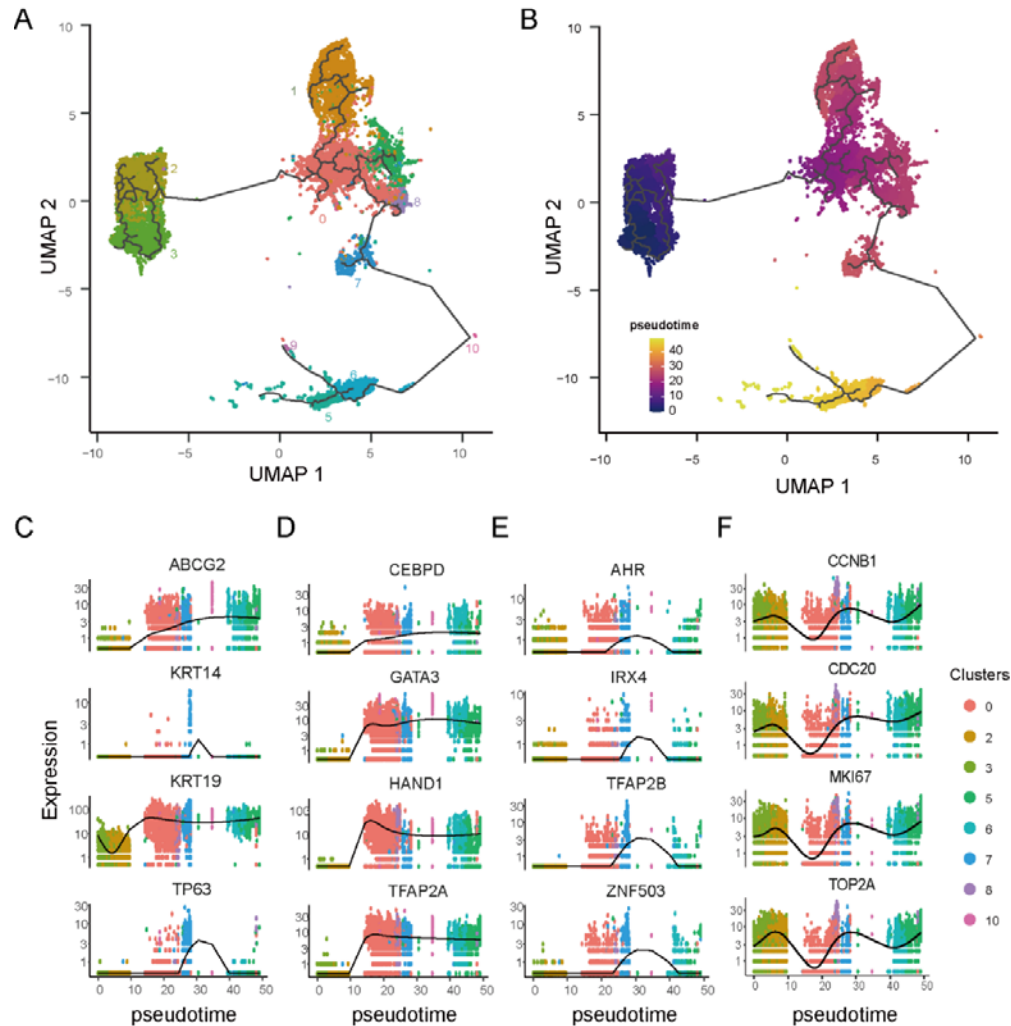

630

631 **Figure 3. Pseudotime analysis characterizes expression changes throughout hESCs-derived LSCs**  
632 **differentiation**

633 (A and B) UMAP visualizing developmental trajectories of cells in each cluster (A) and pseudotime

634 assigned to each cell. (C) Plotting showing tracking changes of the four LSCs marker genes over

635 hESC-derived LSCs differentiation pseudotime. (D and E) Plotting representing tracking changes of

636 TFs upregulated upon differentiation and continually highly expressed (D), and upregulated in certain

637 period (E) over hESC-derived LSCs pseudotime. (F) Plotting representing tracking changes of cell

638 cycle related genes over hESC-derived LSCs pseudotime.

639

640

641

642

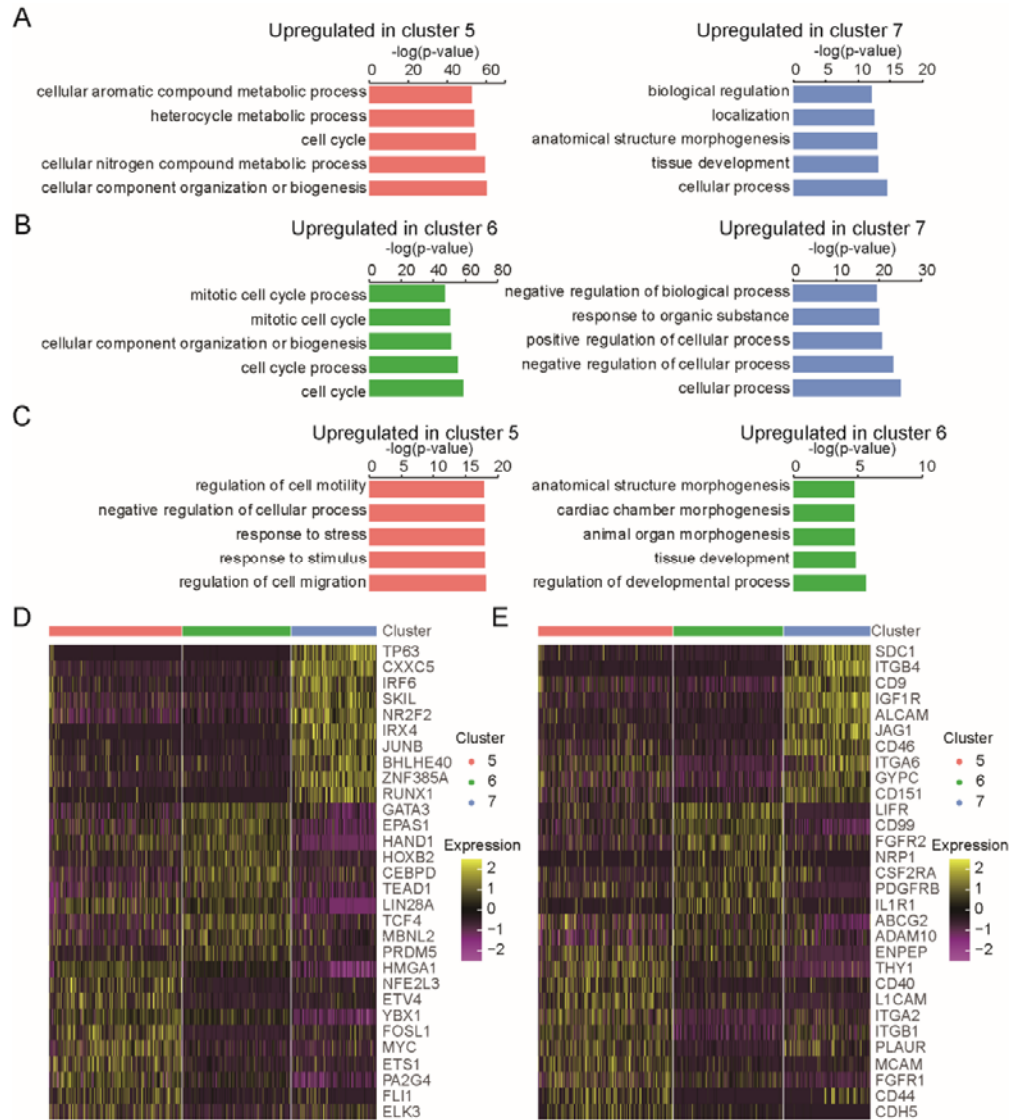

643

644 **Figure 4. Transcriptional difference of subpopulations in hESCs-derived LSCs**

645 (A-C) Barplots showing GO biological process enrichment for upregulated genes compared between  
 646 cluster 5 and cluster 7 (A), between cluster 6 and cluster 7 (B), and between cluster 5 and cluster 6 (C).  
 647 Five terms with lowest p-value were presented. (D) Heatmap representing differentially expressed TFs  
 648 among cluster 5, cluster 6, and cluster 7. (E) Heatmap representing differentially expressed top CD  
 649 genes among cluster 5, cluster 6, and cluster 7. Ten genes with lowest p\_val\_adj were presented.

650
